# Supplementary material
Source: MDPI journal article supplement (https://www.mdpi.com/2571-9408/6/3/170)
Supplement: s1 [file s1]

Archive with 6 entries (5 files):
- supplementary/
- supplementary/heritage-2230338-supplementary S1.pdf
- supplementary/heritage-2230338-supplementary S2.pdf
- supplementary/heritage-2230338-supplementary S3.pdf
- supplementary/Table S1.pdf
- supplementary/Table S2.pdf
