# Supplementary material
Source: MDPI journal article supplement (https://www.mdpi.com/2571-9408/6/3/170)
Supplement: s1 [file s1 › supplementary/heritage-2230338-supplementary S2.pdf]

## Supplementary S2. Folios and Areas of Analysis

Areas of analysis for FORS (○), Raman (●), X-ray fluorescence (●),  $\mu$ -sampling (●).

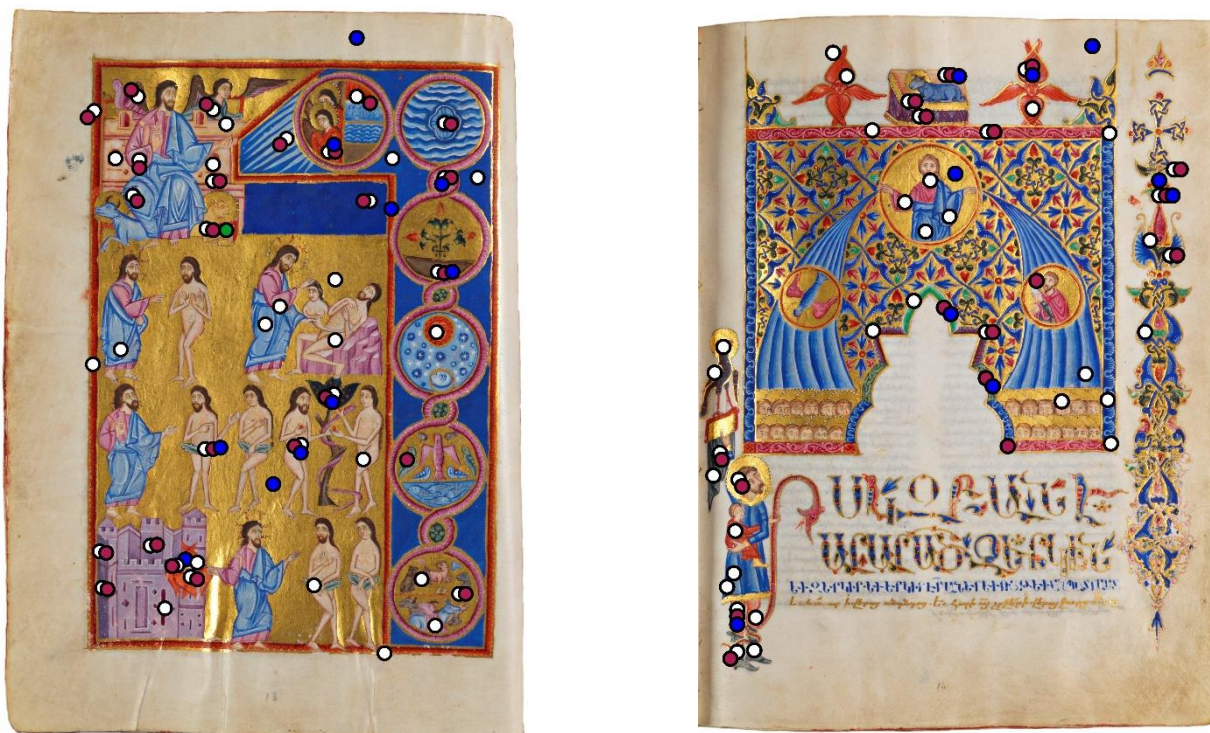

Figure S3. Bible LA 152, pages 13 and 14, © Gulbenkian Museum.

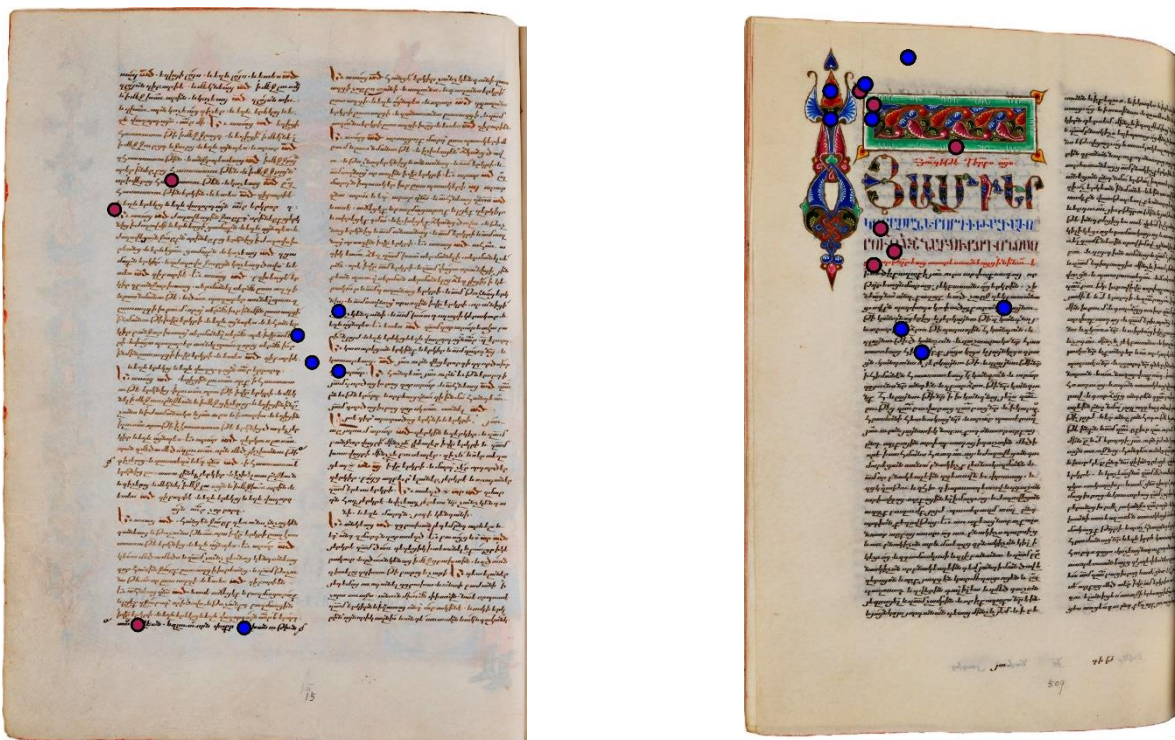

Figure S4. Bible LA 152, pages 15 and 509, © Gulbenkian Museum.

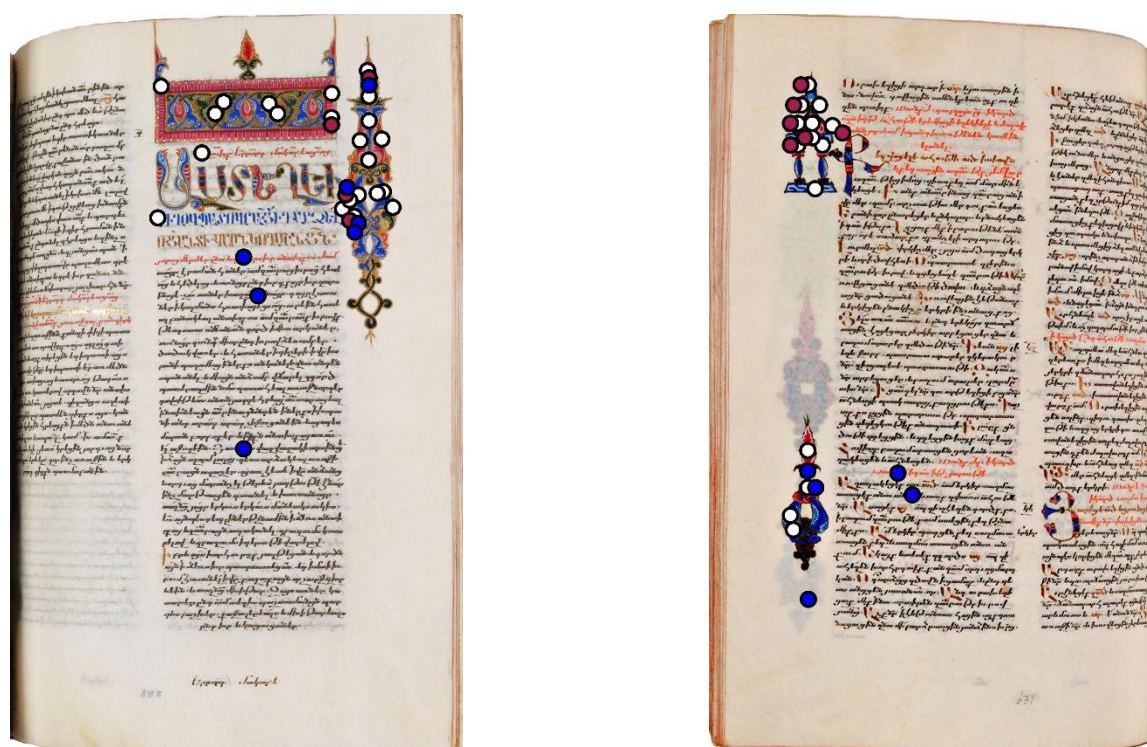

Figure S5. Bible LA 152, pages 588 and 631, © Gulbenkian Museum.

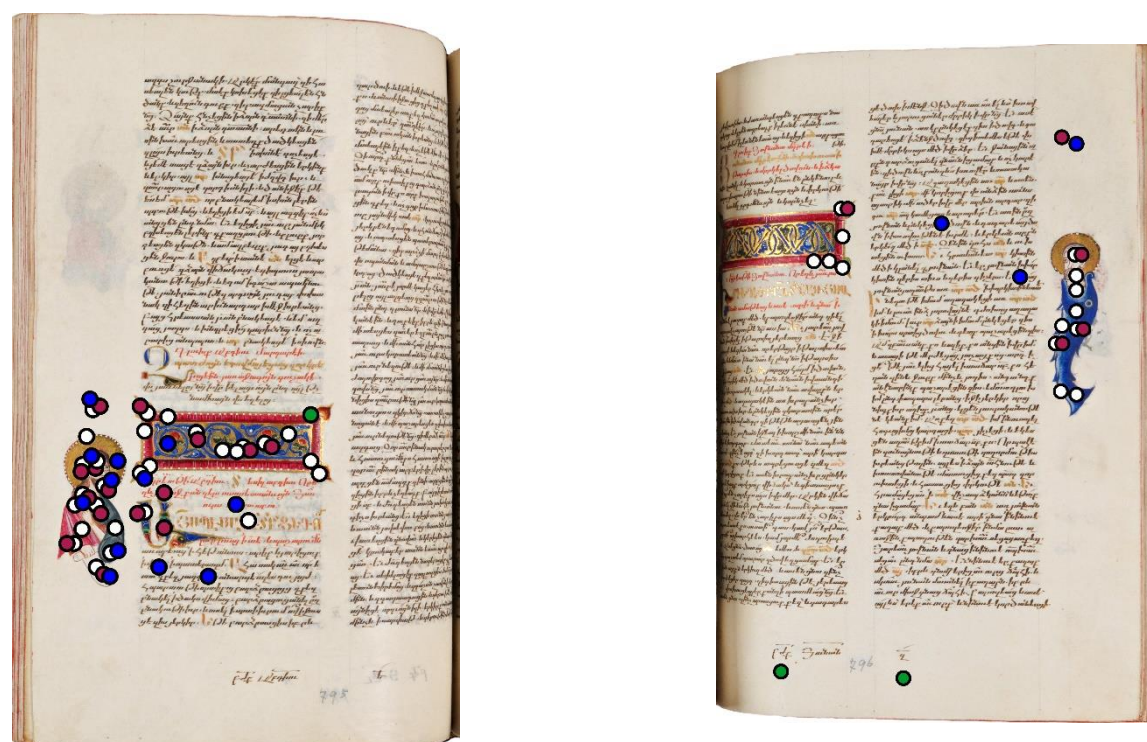

Figure S6. Bible LA 152, pages 795 and 796, © Gulbenkian Museum.

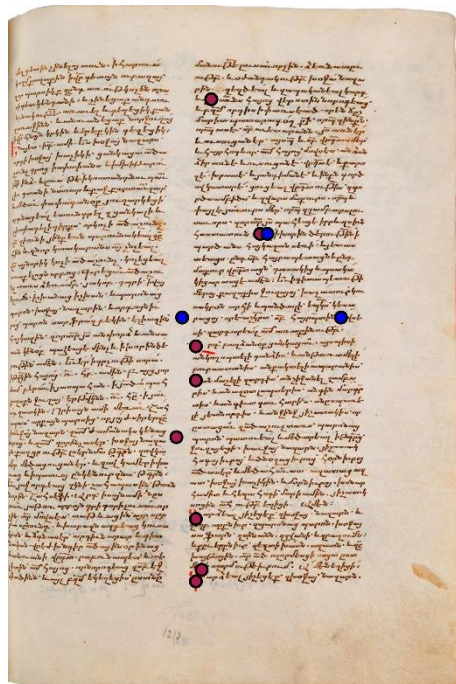

Figure S7. Bible LA 152, page 1210, © Gulbenkian Museum.

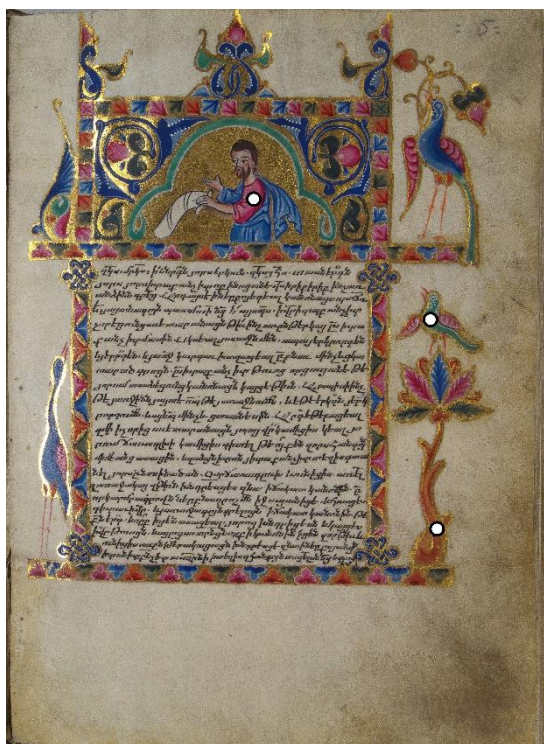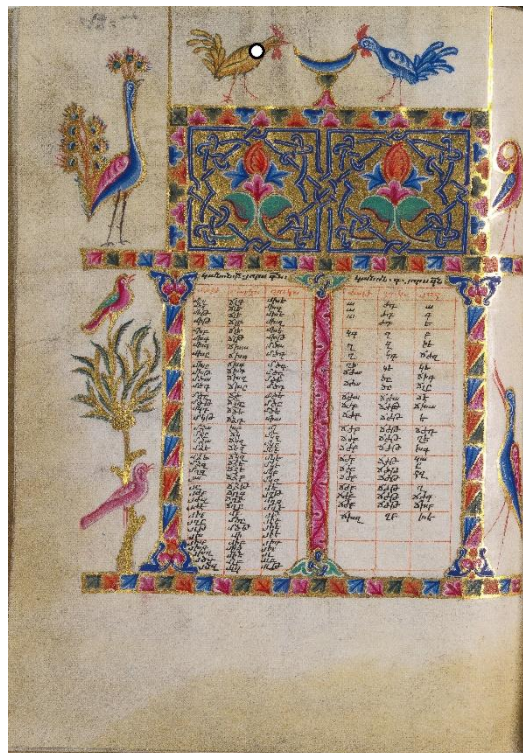

Figure S8. Gospel LA 193, pages 5 and 12, © Gulbenkian Museum.

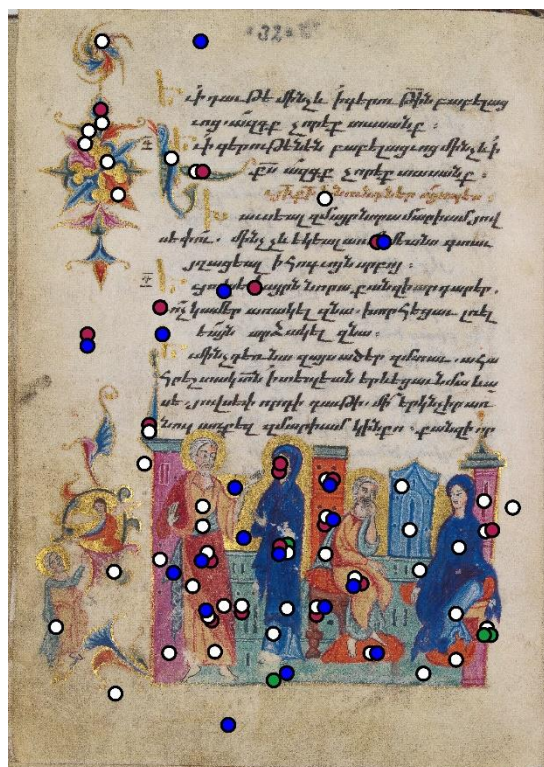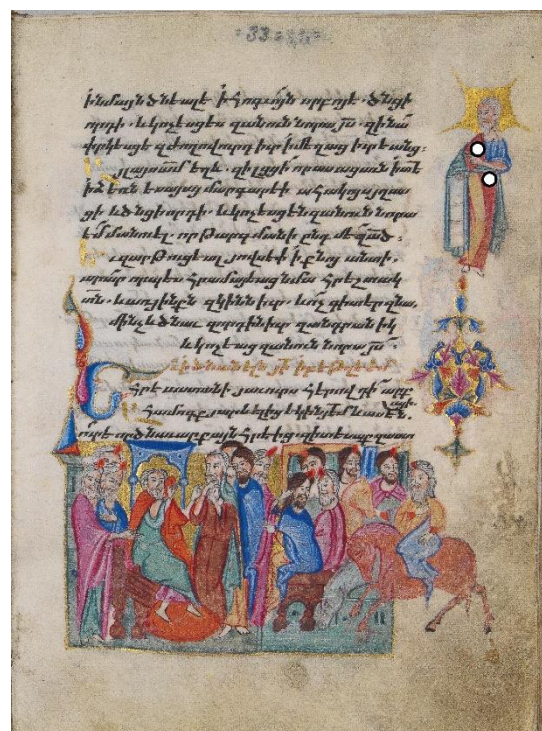

Figure S9. Gospel LA 193, pages 32 and 33, © Gulbenkian Museum.

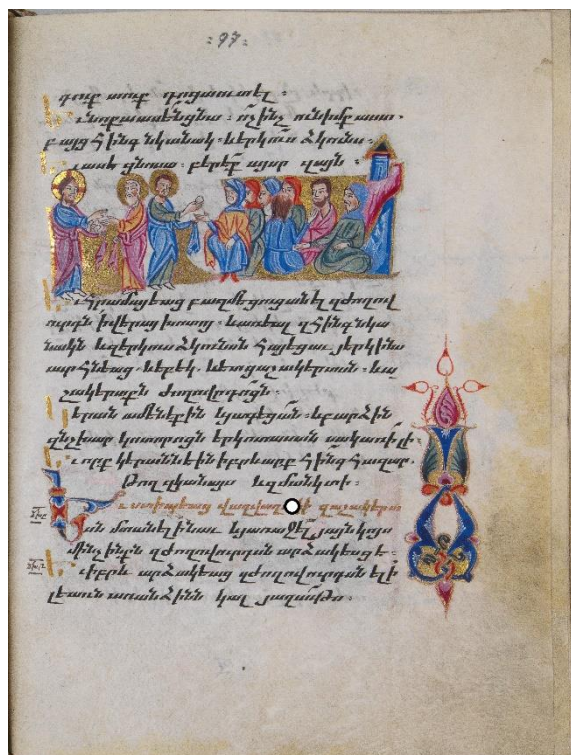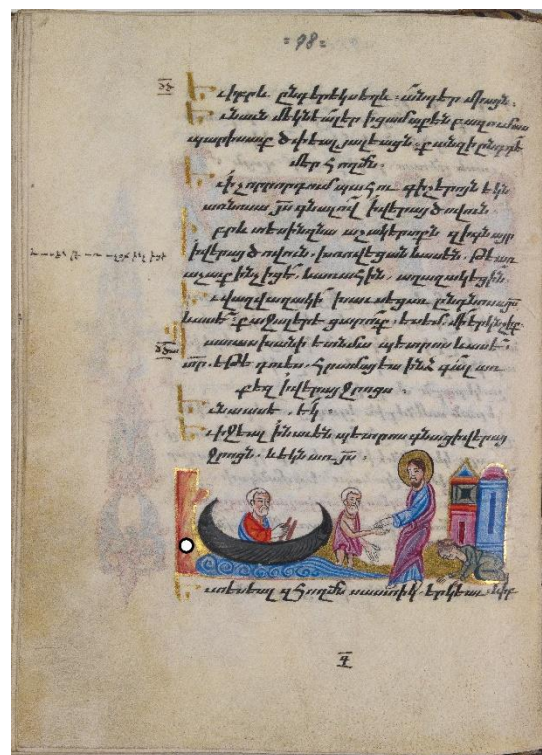

Figure S10. Gospel LA 193, pages 97 and 98, © Gulbenkian Museum.

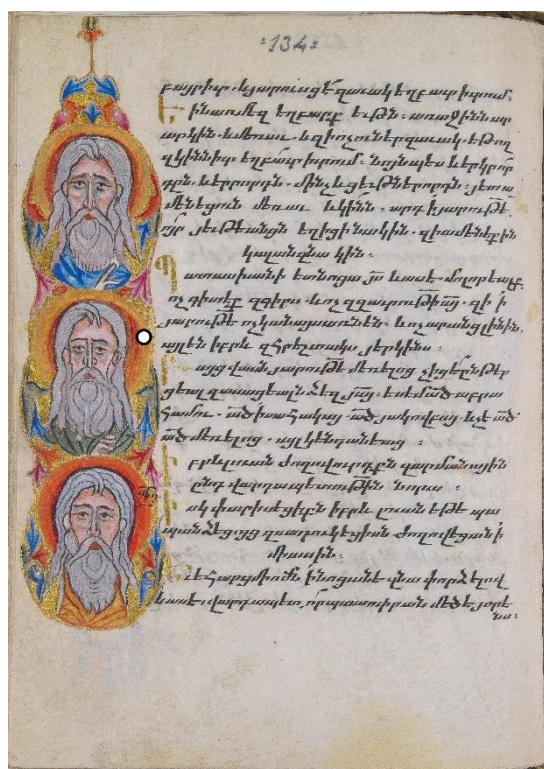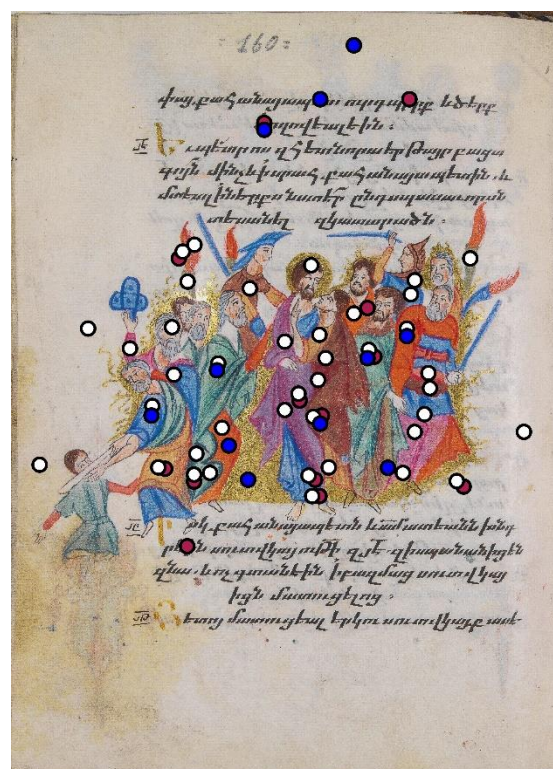

Figure S11. Gospel LA 193, pages 134 and 160, © Gulbenkian Museum.

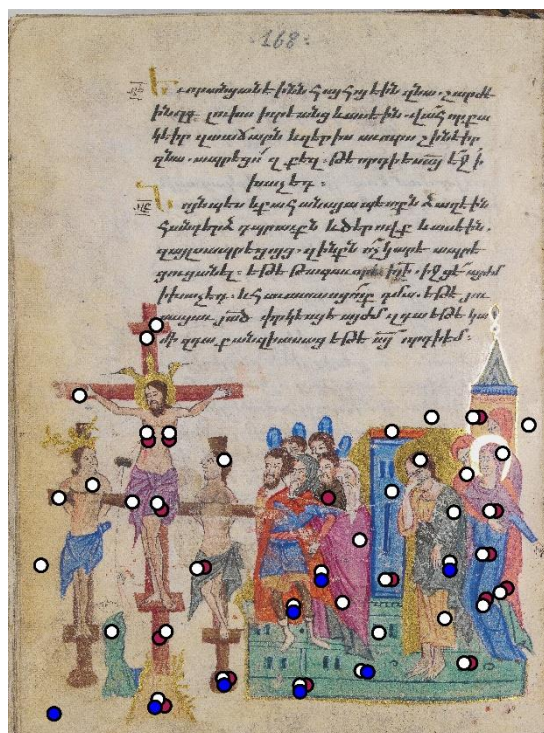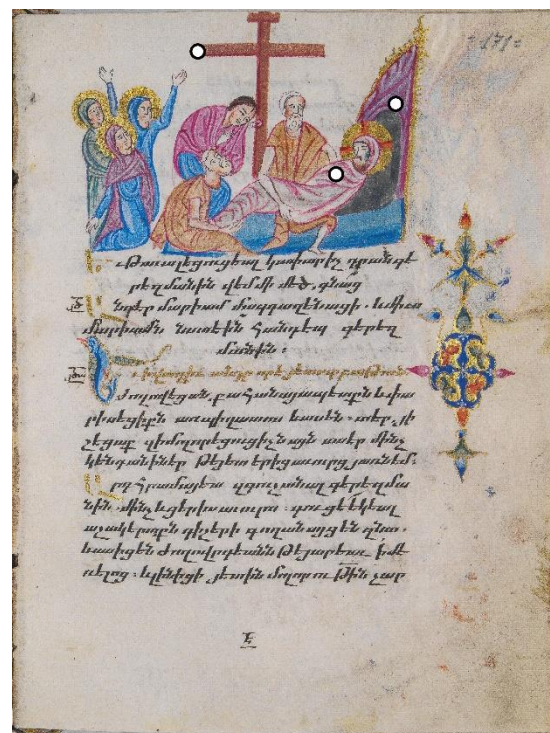

Figure S12. Gospel LA 193, pages 168 and 171, © Gulbenkian Museum.

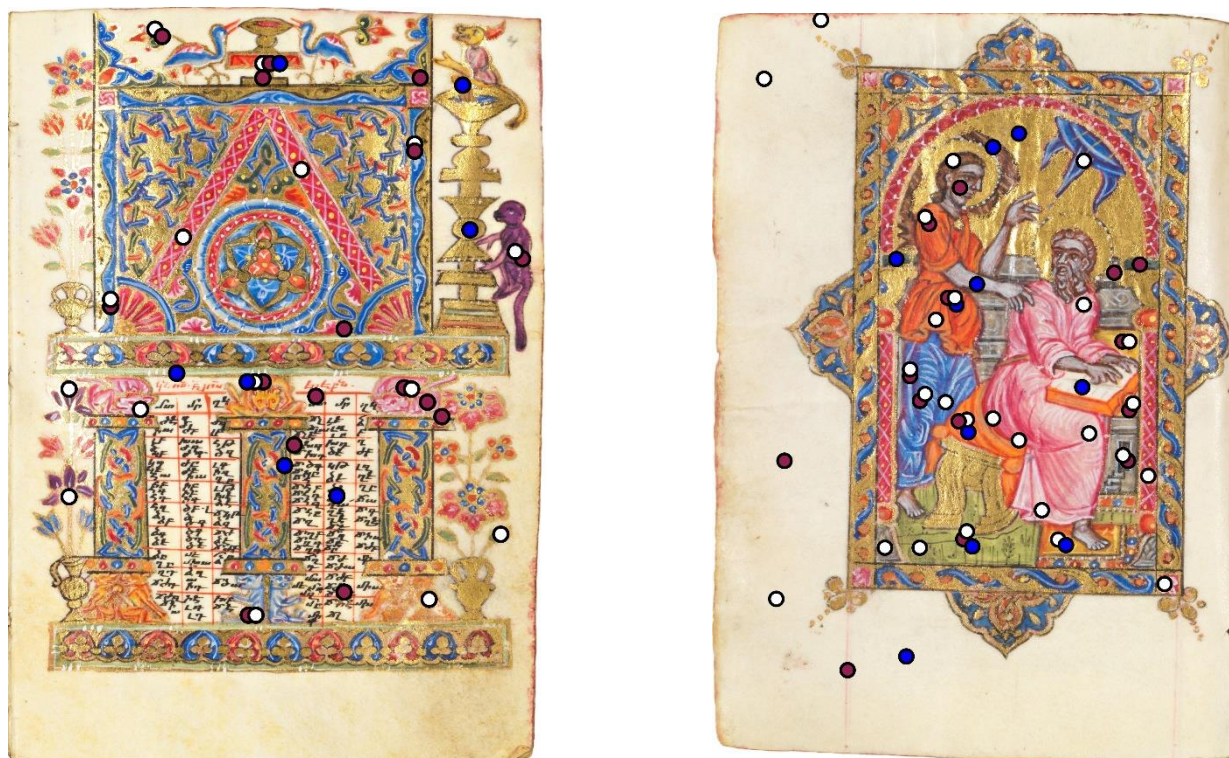

Figure S13. Gospel LA 216, folia 4r and 11v, © Gulbenkian Museum.

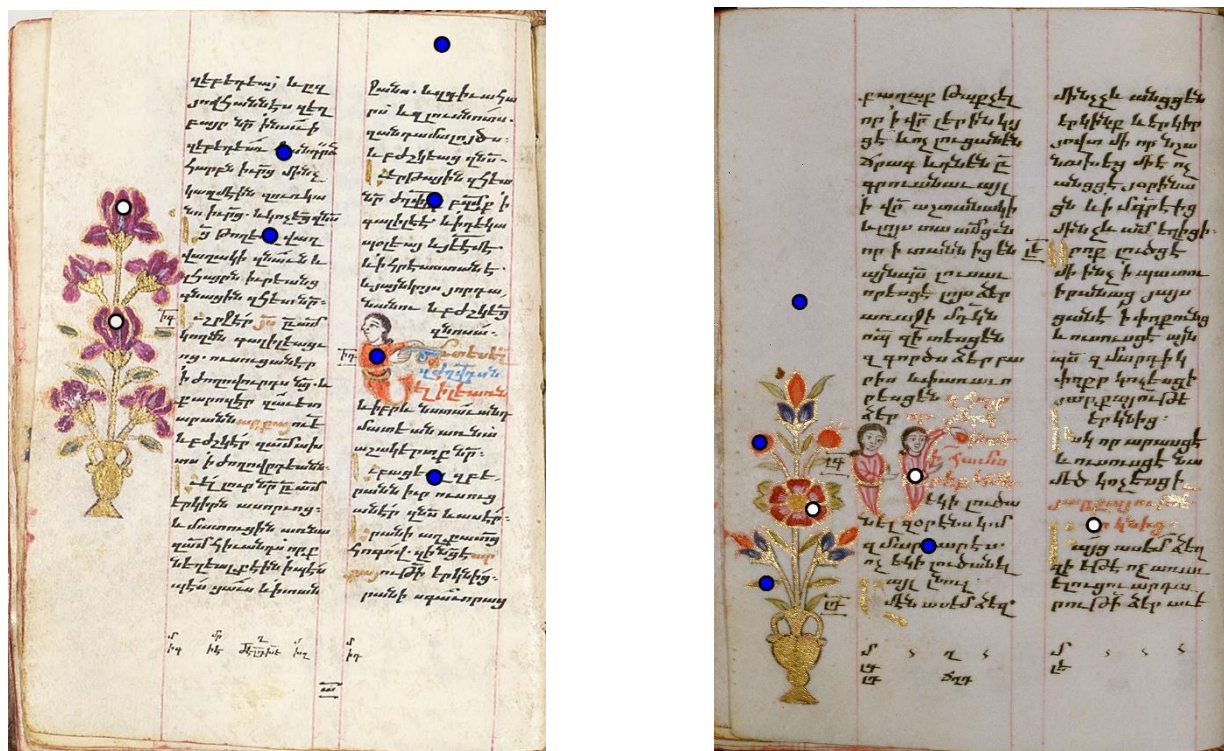

Figure S14. Gospel LA 216, folia 22v and 23v, © Gulbenkian Museum.

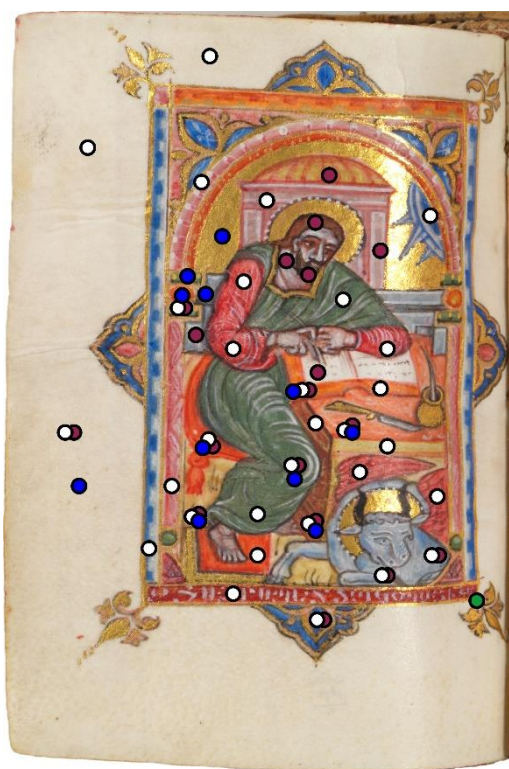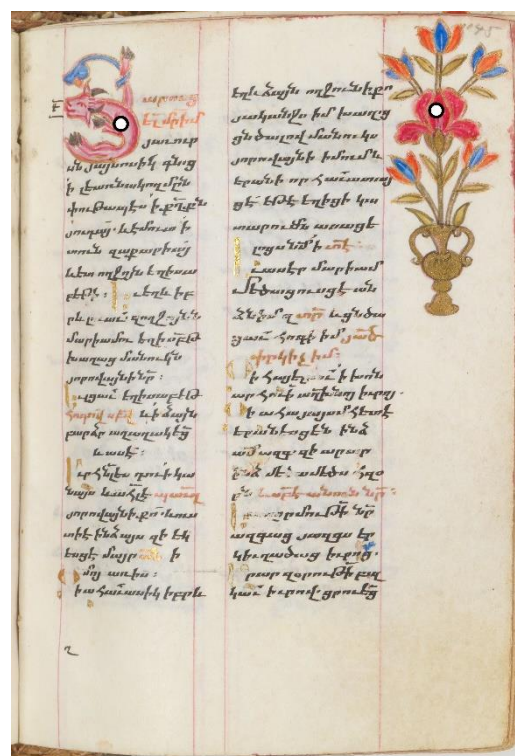

Figure S15. Gospel LA 216, folia 141v and 145r, © Gulbenkian Museum.

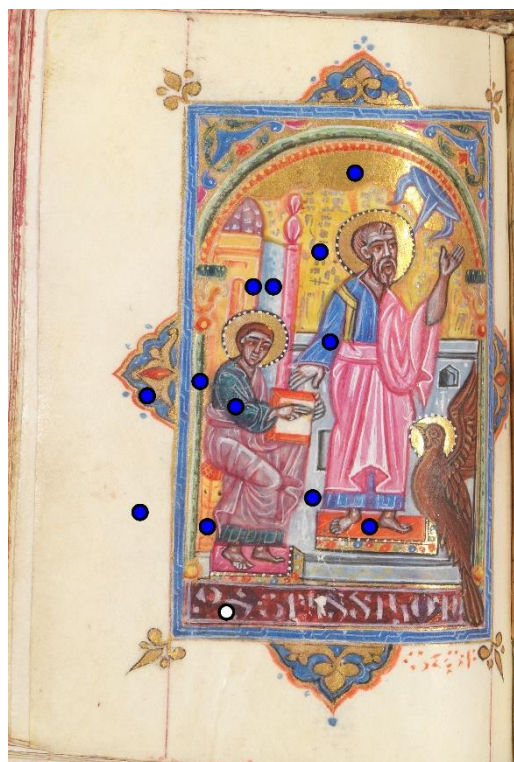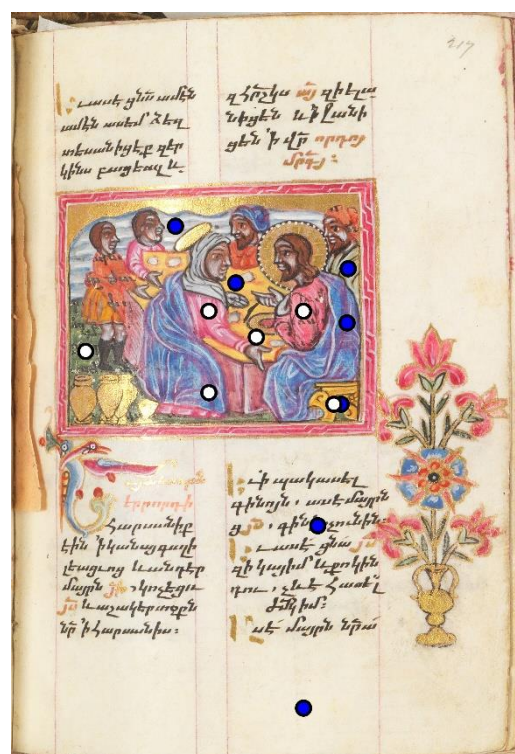

Figure S16. Gospel LA 216, folia 213v and 217r, © Gulbenkian Museum.

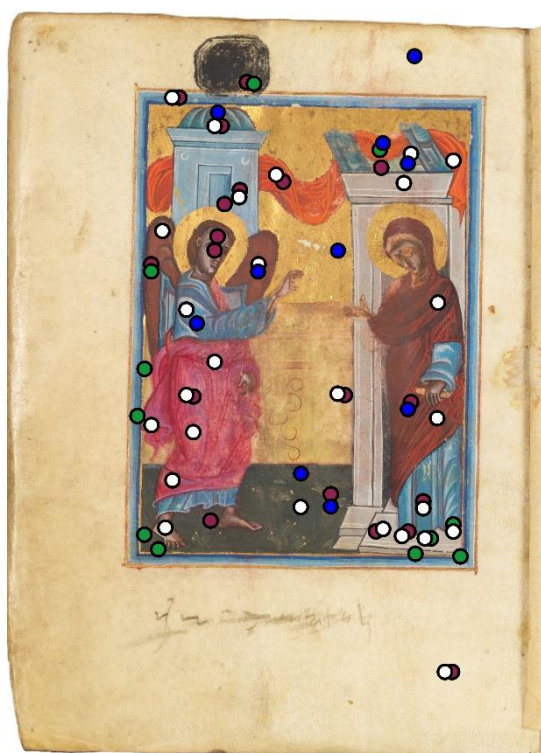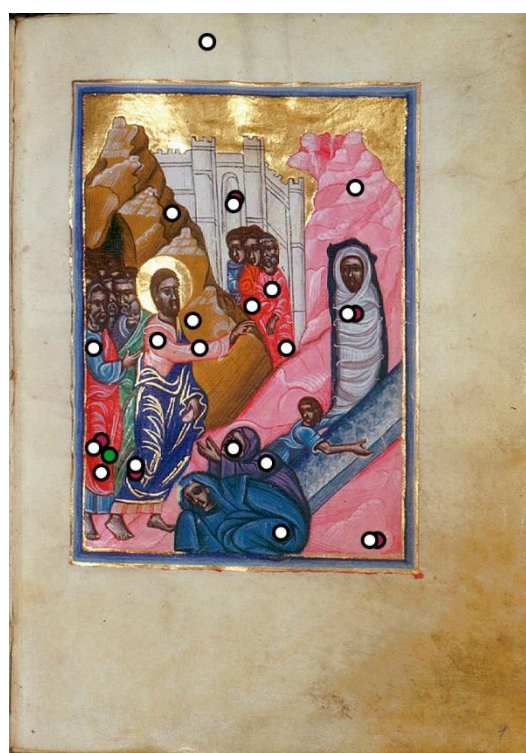

Figure S17. Gospel LA 253, folia 5v and 9r, © Gulbenkian Museum.

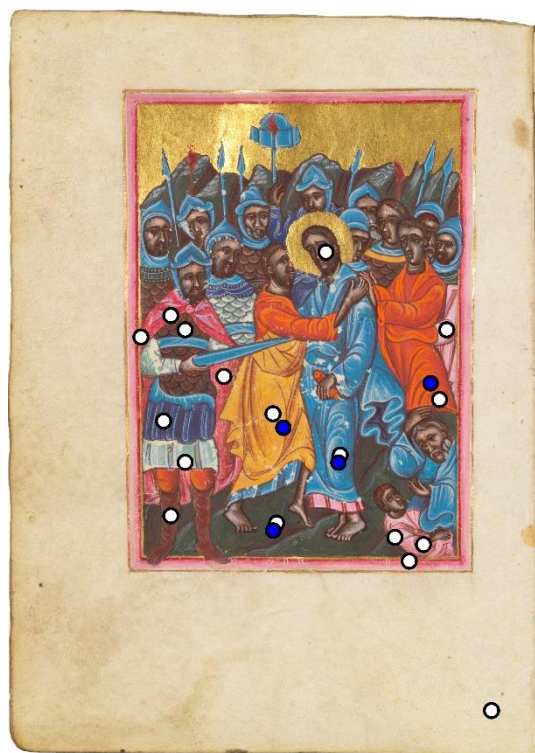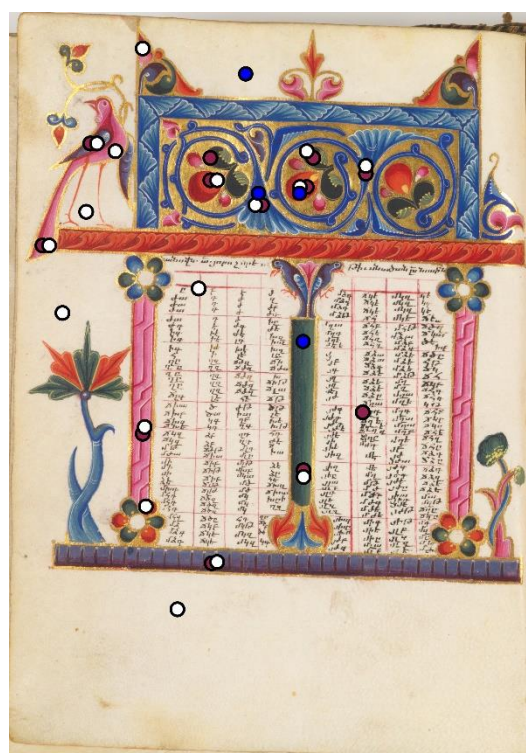

Figure S18. Gospel LA 253, folia 12v and 19v, © Gulbenkian Museum.

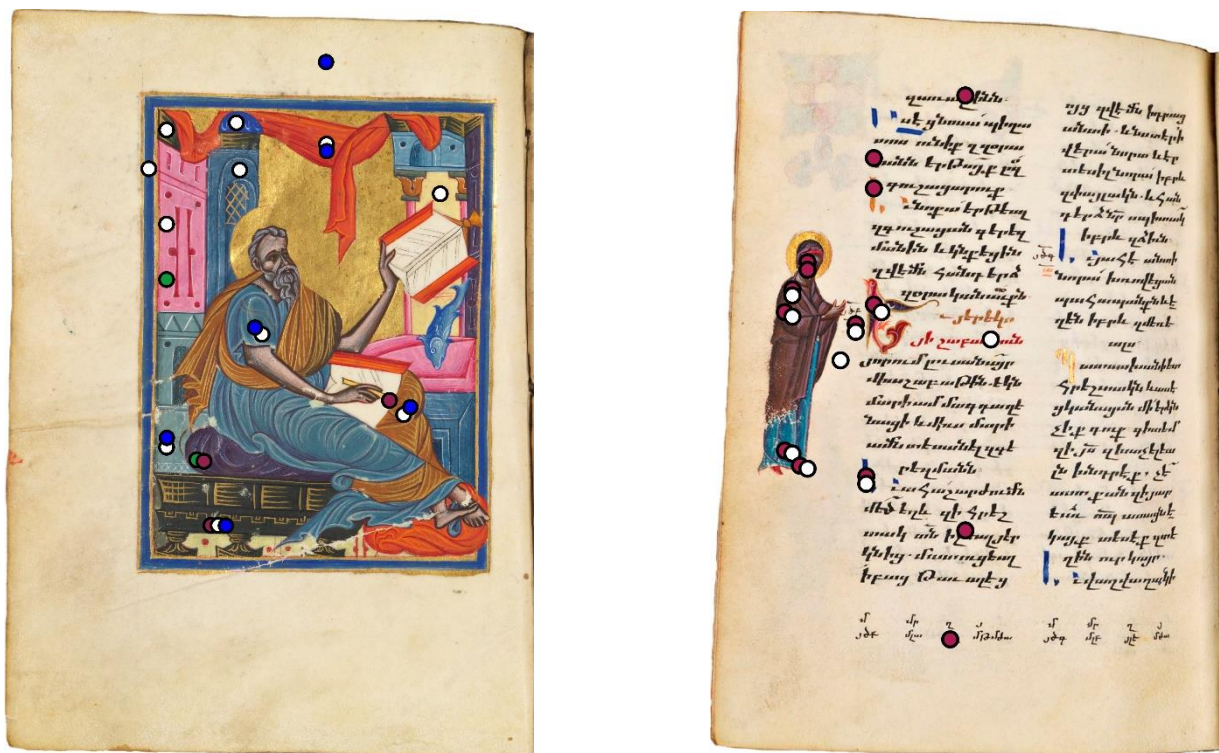

Figure S19. Gospel LA 253, folia 28v and 91v, © Gulbenkian Museum.

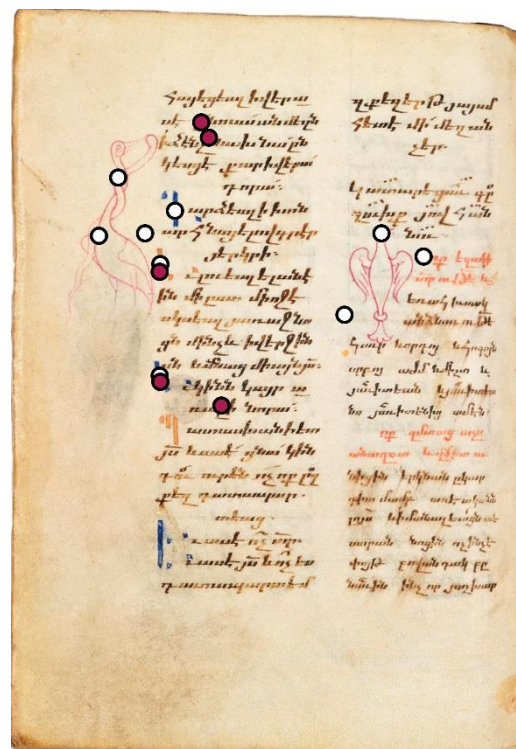

Figure S20. Gospel LA 253, folio 277v, © Gulbenkian Museum.
