# Supplementary material
Source: MDPI journal article supplement (https://www.mdpi.com/2571-9408/6/3/170)
Supplement: s1 [file s1 › supplementary/heritage-2230338-supplementary S3.pdf]

## Supplementary S3. Spectral Data

### Supplementary S3.1. Reflectance spectra and Raman spectra

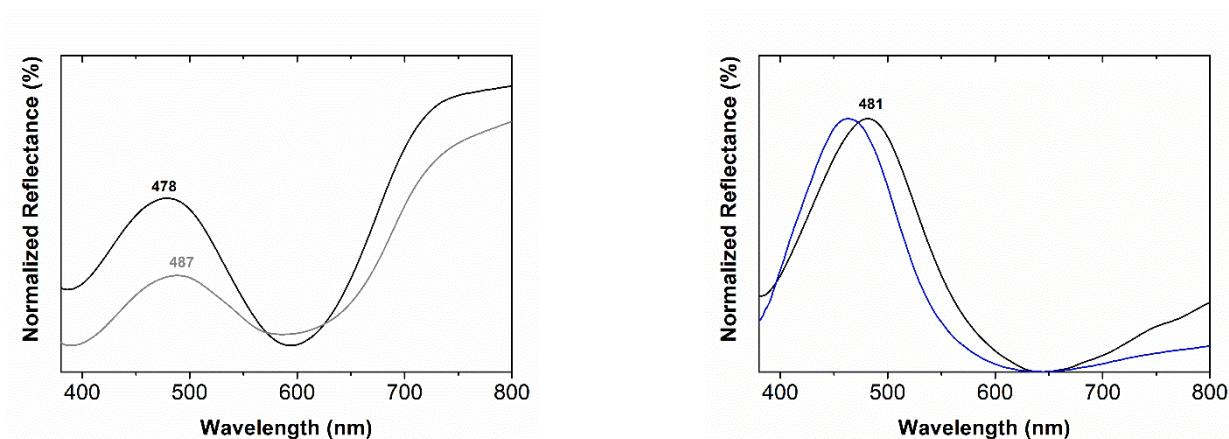

**Figure S21.** Reflectance spectra of blue colors: *right*, lapis lazuli (black), LA152 p. 13, mixture with indigo (grey), LA253 f. 9r; *left*, azurite, LA253 f. 91v (black), compared with a reference of azurite applied on parchment (blue).

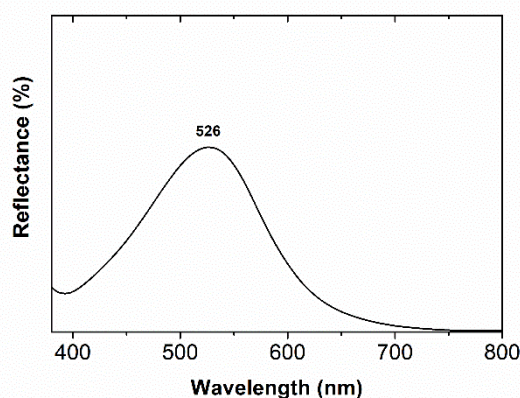

**Figure S22.** Reflectance spectrum of malachite, from LA152 p.14.

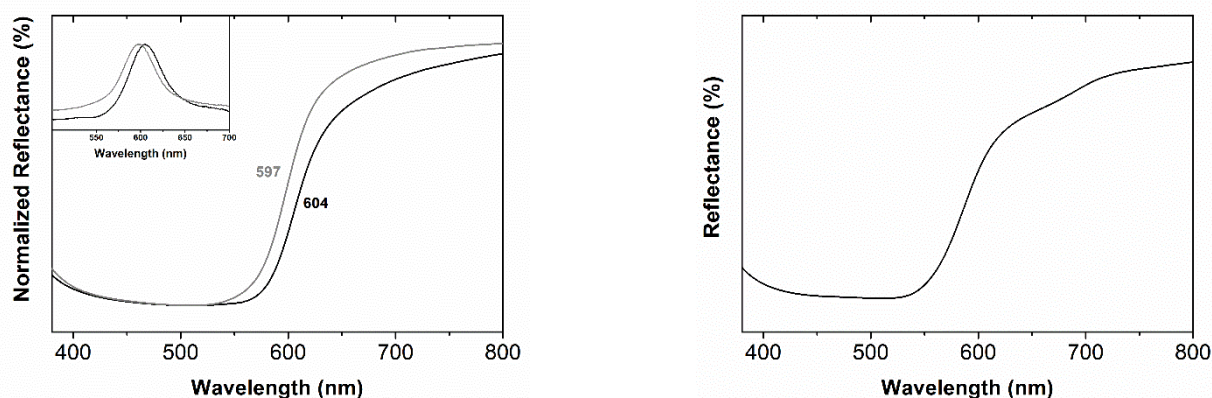

**Figure S23.** Reflectance spectra of orange-red colors: *right*, vermilion (black), LA253 f. 19v, and a mixture of vermilion and minium (grey), LA152 p. 14. The insert shows the first derivative which allows us to identify the inflection point. *Left*, mixture of minium and orpiment, LA216 f. 11v.

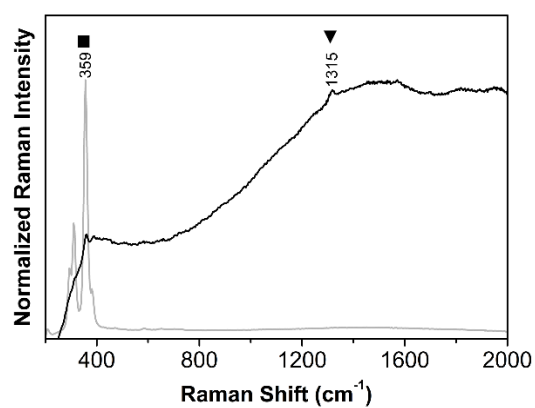

Figure S24. Raman spectra of green color produced with orpiment (■) and lapis lazuli (▼), from LA152 p. 13.

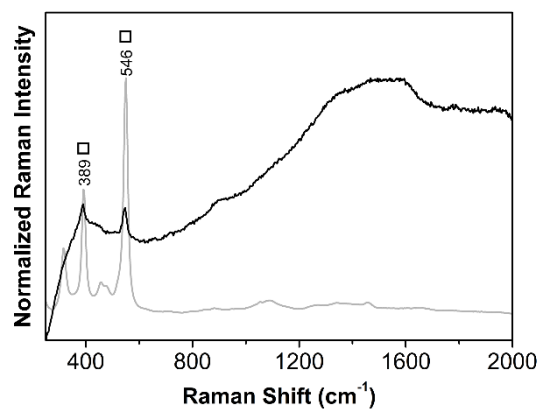

Figure S25. Raman spectra of brown color found in LA152 p. 795, composed by minium (□) and carbon black.

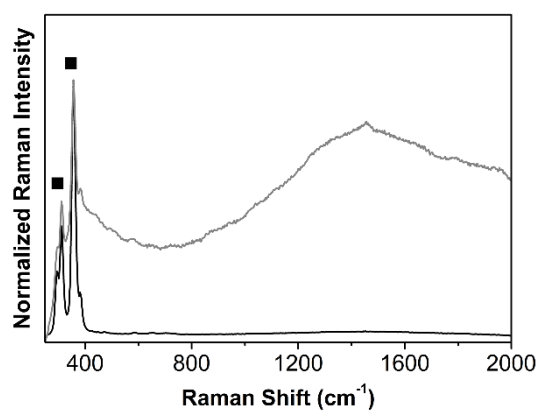

Figure S26. Raman spectra of salmon color found LA152 p. 13, composed by cochineal, previously identified by FORS, and orpiment (■).

## Supplementary S3.2. X-Ray Fluorescence Spectrometry | XRF Data

**Table S3.** Net count areas and standard deviation for the oranges' key elements characteristic peaks.

| Doc. Ref | Page | Area of Analysis | Area $\pm$ Std.Dev. |                  |                  |
|----------|------|------------------|---------------------|------------------|------------------|
|          |      |                  | Hg L $\alpha$       | Pb L $\alpha$    | As K $\alpha$    |
| LA 152   | 13   | 1                | 4385 $\pm$ 3        | 22,496 $\pm$ 5   |                  |
|          |      | 6                | 13,278 $\pm$ 126    | 7393 $\pm$ 101   |                  |
|          | 14   | 1                | 19,492 $\pm$ 149    | 23,721 $\pm$ 164 |                  |
|          |      | 5                | 1940 $\pm$ 2        | 4957 $\pm$ 3     |                  |
|          |      | 10               | 1343 $\pm$ 57       | 31,357 $\pm$ 181 |                  |
|          | 509  | 4                | 798 $\pm$ 55        | 2036 $\pm$ 71    | 15,452 $\pm$ 159 |
|          | 588  | 4                | 31,171 $\pm$ 184    | 30,555 $\pm$ 183 |                  |
|          |      | 5                | 22,064 $\pm$ 161    | 2357 $\pm$ 76    |                  |
|          | 795  | 7                |                     | 22,298 $\pm$ 171 | 21,017 $\pm$ 273 |
|          |      | 8                | 464 $\pm$ 56        | 1534 $\pm$ 76    | 28,829 $\pm$ 200 |
|          |      | 10               | 4298 $\pm$ 86       | 309 $\pm$ 54     |                  |
|          |      | 3                | 12,254 $\pm$ 124    | 176 $\pm$ 54     |                  |
| LA 193   | 32   | 3                |                     | 21,540 $\pm$ 5   | 6437 $\pm$ 5     |
|          |      | 6                |                     | 11,474 $\pm$ 118 |                  |
|          |      | 7                | 18,046 $\pm$ 4      | 17,896 $\pm$ 3   | 127 $\pm$ 5      |
|          | 160  | 2                | 19,509 $\pm$ 5      | 3196 $\pm$ 2     |                  |
|          |      | 4                | 47,038 $\pm$ 7      | 5813 $\pm$ 3     |                  |
|          |      | 3                | 16,352 $\pm$ 4      | 1286 $\pm$ 2     |                  |
| LA 216   | 4    | 4                | 17,587 $\pm$ 4      | 3990 $\pm$ 3     | 1924 $\pm$ 3     |
|          |      | 1                | 11,924 $\pm$ 4      | 9857 $\pm$ 3     | 12,854 $\pm$ 5   |
|          |      | 3                | 1464 $\pm$ 69       | 3658 $\pm$ 100   | 20,459 $\pm$ 195 |
|          |      | 8                | 3670 $\pm$ 84       | 4749 $\pm$ 97    | 976 $\pm$ 132    |
|          | 11   | 2                | 3488 $\pm$ 3        | 27,052 $\pm$ 4   | 13,429 $\pm$ 7   |
|          |      | 4                | 6569 $\pm$ 101      | 25,601 $\pm$ 185 | 16,510 $\pm$ 281 |
|          |      | 6                | 10,734 $\pm$ 121    | 12,740 $\pm$ 146 | 4096 $\pm$ 201   |
|          | 22   | 1                | 11,065 $\pm$ 123    | 19747 $\pm$ 118  |                  |
|          | 23   | 2                | 1388 $\pm$ 70       | 6067 $\pm$ 100   |                  |
|          | 141  | 3                | 8604 $\pm$ 110      | 12,493 $\pm$ 146 | 3229 $\pm$ 199   |
|          |      | 5                | 6117 $\pm$ 98       | 10,867 $\pm$ 142 | 7565 $\pm$ 204   |
|          |      | 9                | 489 $\pm$ 57        | 16,150 $\pm$ 160 | 4232 $\pm$ 220   |
|          | 213  | 5                | 329 $\pm$ 52        | 11,344 $\pm$ 139 | 4564 $\pm$ 193   |
| LA 253   | 5    | 5                | 2902 $\pm$ 2        | 6462 $\pm$ 3     |                  |
|          | 12   | 4                | 12,844 $\pm$ 4      | 34373 $\pm$ 5    | 7245 $\pm$ 7     |
|          | 19   | 2                | 5327 $\pm$ 3        | 1514 $\pm$ 1     | 247 $\pm$ 2      |
|          | 28   | 5                | 23,839 $\pm$ 168    | 2719 $\pm$ 74    |                  |

**Table S4.** Net count areas and standard deviation for the yellows' key elements characteristic peaks.

| Doc. Ref. | Page | Area of Analysis | Area $\pm$ Std. Dev. |               |
|-----------|------|------------------|----------------------|---------------|
|           |      |                  | As K $\alpha$        | Fe K $\alpha$ |
| LA 152    | 509  | 2                | 8294 $\pm$ 474       |               |
| LA 193    | 168  | 7                | 4716 $\pm$ 466       |               |
| LA 216    | 4    | 3                | 23,300 $\pm$ 622     |               |
|           | 23   | 1                | 2889 $\pm$ 526       |               |
|           | 213  | 1                | 19,126 $\pm$ 708     |               |
|           | 217  | 1                | 21,436 $\pm$ 871     |               |
|           |      | 3                | 13,833 $\pm$ 656     | 5834 $\pm$ 93 |
| LA 253    | 12   | 3                | 12,296 $\pm$ 621     |               |

**Table S5.** Net count areas and standard deviation for the greens' key elements characteristic peaks.

| Doc. Ref. | Page | Areas of Analysis | Area $\pm$ Std. Dev. |                  |                  |
|-----------|------|-------------------|----------------------|------------------|------------------|
|           |      |                   | Cu K $\alpha$        | As K $\alpha$    | Fe K $\alpha$    |
| LA 152    | 13   | 2                 |                      |                  |                  |
|           |      | 7                 |                      | 2398 $\pm$ 4     |                  |
|           | 14   | 3                 | 26,510 $\pm$ 169     | 3787 $\pm$ 441   |                  |
|           |      | 7                 | 83,357 $\pm$ 294     | 2585 $\pm$ 585   |                  |
|           |      | 8                 |                      | 7860 $\pm$ 3     |                  |
|           | 509  | 1                 | 126,419 $\pm$ 360    | 3957 $\pm$ 401   |                  |
|           | 588  | 2                 | 8464 $\pm$ 3         | 2148 $\pm$ 4     | 2756 $\pm$ 2     |
|           | 631  | 1                 | 84,898 $\pm$ 297     | 2636 $\pm$ 378   |                  |
|           | 795  | 3                 |                      | 14,003 $\pm$ 737 |                  |
|           |      | 9                 |                      |                  |                  |
| LA 193    | 32   | 5                 | 7710 $\pm$ 97        | 1043 $\pm$ 468   |                  |
|           | 160  | 1                 | 51,543 $\pm$ 233     | 3630 $\pm$ 686   |                  |
|           |      | 3                 | 36,094 $\pm$ 196     |                  |                  |
|           | 168  | 1                 | 42,559 $\pm$ 212     |                  |                  |
|           |      | 2                 | 40,501 $\pm$ 207     |                  |                  |
| LA 216    | 4    | 5                 |                      | 17,858 $\pm$ 5   |                  |
|           |      | 7                 | 15,700 $\pm$ 134     | 4438 $\pm$ 515   |                  |
|           | 11   | 1                 |                      | 19999 $\pm$ 5    |                  |
|           | 141  | 1                 |                      | 24,323 $\pm$ 859 |                  |
|           |      | 8                 |                      | 11525 $\pm$ 5    |                  |
|           | 213  | 8                 | 33,868 $\pm$ 191     | 3664 $\pm$ 599   |                  |
| LA 253    | 5    | 1                 | 1848 $\pm$ 53        | 13,057 $\pm$ 560 | 28,239 $\pm$ 171 |
|           |      | 3                 | 1933 $\pm$ 54        | 18,032 $\pm$ 574 | 32,751 $\pm$ 184 |
|           |      | 9                 |                      |                  |                  |
|           | 12   | 1                 | 3569 $\pm$ 70        | 8464 $\pm$ 637   | 16,752 $\pm$ 133 |
|           | 19   | 1                 | 1701 $\pm$ 56        | 50,358 $\pm$ 668 |                  |
|           | 28   | 3                 |                      | 2573 $\pm$ 826   |                  |

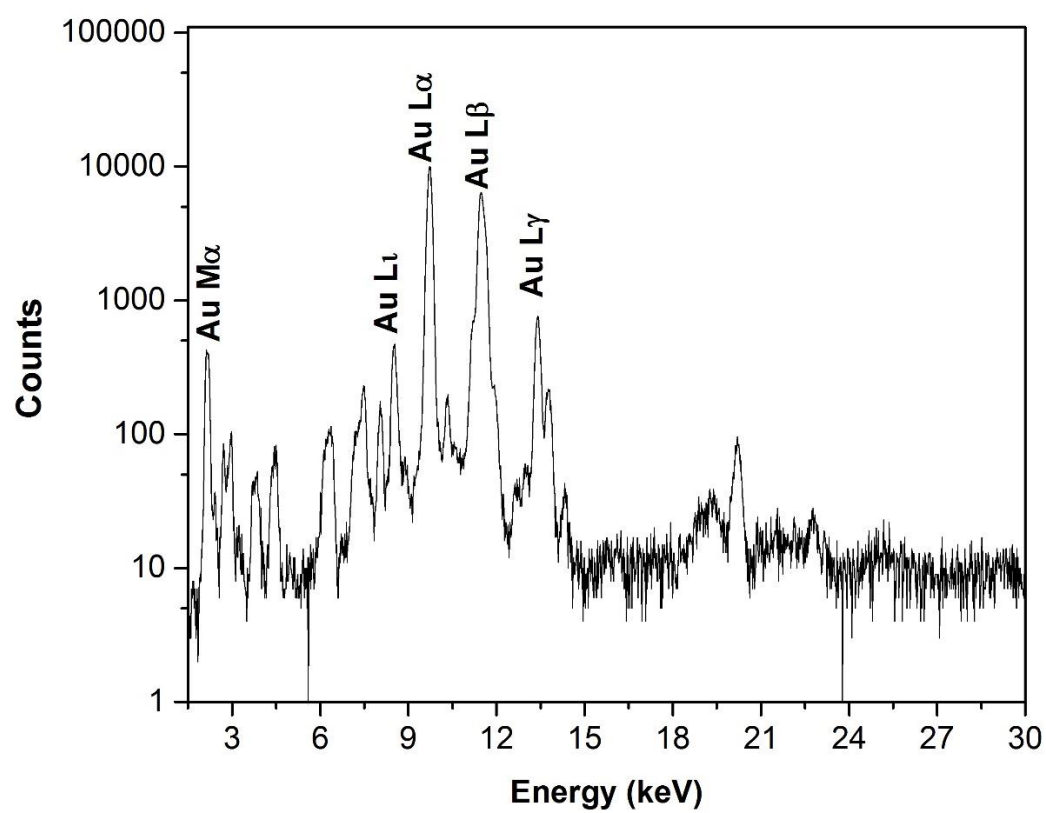

**Figure S27.** XRF spectrum obtained at a gilded area from Bible LA 152.

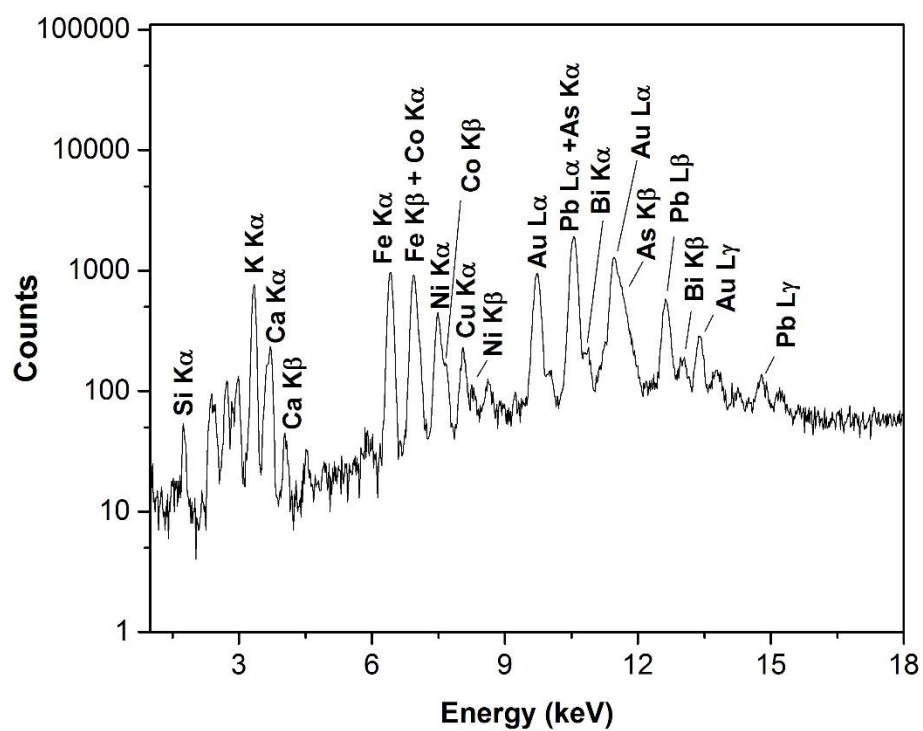

Figure S28. XRF spectrum obtained at a blue area from Gospel LA 216.
