# Supplementary material
Source: MDPI journal article supplement (https://www.mdpi.com/2571-9408/6/3/170)
Supplement: s1 [file s1 › supplementary/Table S1.pdf]

## Supplementary Material

**Table S1.** The list of organic and inorganic **pigments** identified in Armenian manuscripts. Names for the pigments are maintained with their initial designation by the authors. Acronyms for the techniques are provided at the end of the table.

| Colour        | Dye/Pigment                                                                     | Ms. Date               | School   | Sampling | Technique                    | Spectra | Ref.             |
|---------------|---------------------------------------------------------------------------------|------------------------|----------|----------|------------------------------|---------|------------------|
| <b>WHITE</b>  |                                                                                 |                        |          |          |                              |         |                  |
|               | White Lead                                                                      | 1045-64                | Kars     | Yes      | --                           | --      | Cabelli 1984     |
|               | White Lead                                                                      | 1253-1348              | Cilicia  | Yes      | PLM, XRD                     | No      | Cabelli 1982-84  |
|               | White Lead                                                                      | 13-14 <sup>th</sup> c. | Gladzor  | Yes      | PLM, XRD                     | No      | Orna 1981        |
|               | White Lead                                                                      | 14 <sup>th</sup> c.    | Van      | Yes      | Raman                        | No      | Keheyanyan 2016a |
|               | White Lead                                                                      | 1455-1575              | Van      | Yes      | PLM, XRD                     | No      | Cabelli 1982-84  |
|               | White Lead                                                                      | 15 <sup>th</sup> c.    | Van      | Yes      | Raman                        | No      | Keheyanyan 2018  |
|               | White Lead                                                                      | 16-17 <sup>th</sup> c. | Edessa   | No       | Raman                        | No      | Keheyanyan 2016b |
|               | Calcined bone                                                                   | 13-14 <sup>th</sup> c. | Gladzor  | Yes      | PLM, XRD                     | No      | Orna 1981        |
|               | Gypsum                                                                          | 13-14 <sup>th</sup> c. | Gladzor  | Yes      | PLM, XRD                     | No      | Orna 1981        |
|               | Anhydrite                                                                       | 13-14 <sup>th</sup> c. | Gladzor  | Yes      | XRD                          | No      | Orna 1981        |
|               | Quartz                                                                          | 13-14 <sup>th</sup> c. | Gladzor  | Yes      | PLM, XRD                     | No      | Orna 1981        |
|               | <i>Tin white (Cassiterite)</i>                                                  | 1487                   | Noravank | Yes      | $\mu$ XRD                    | Yes     | Brostoff 2010    |
| <b>YELLOW</b> |                                                                                 |                        |          |          |                              |         |                  |
|               | Orpiment                                                                        | 13-14 <sup>th</sup> c. | Gladzor  | Yes      | PLM, XRD                     | No      | Orna 1981        |
|               | Orpiment                                                                        | 1348                   | Cilicia  | Yes      | PLM, XRD                     | No      | Cabelli 1984     |
|               | <i>Orpiment</i>                                                                 | 14 <sup>th</sup> c.    | Van      | Yes      | Raman                        | Yes     | Keheyanyan 2016a |
|               | Orpiment                                                                        | 15 <sup>th</sup> c.    | Van      | Yes      | Raman                        | No      | Keheyanyan 2018  |
|               | Orpiment                                                                        | 1455, 1575             | Van      | Yes      | PLM, XRD                     | No      | Cabelli 1982-84  |
|               | Orpiment                                                                        | 16-17 <sup>th</sup> c. | Edessa   | No       | FORS (UV-VIS),<br>Raman, XRF | No      | Keheyanyan 2016b |
|               | Yellow ochre                                                                    | 16-17 <sup>th</sup> c. | Edessa   | No       | FORS (UV-VIS),<br>Raman, XRF | No      | Keheyanyan 2016b |
|               | Gamboge                                                                         | 13-14 <sup>th</sup> c. | Gladzor  | Yes      | PLM (tentatively)            | No      | Orna 1981        |
|               | Organic beige                                                                   | 1455                   | Van      | Yes      | PLM, XRD                     | No      | Cabelli 1982     |
| <b>GOLD</b>   |                                                                                 |                        |          |          |                              |         |                  |
|               | Gold                                                                            | 12-13 <sup>th</sup> c. | Cilicia  | Yes      | XRD                          | No      | Cabelli 1982-84  |
|               | Gold                                                                            | 13-14 <sup>th</sup> c. | Gladzor  | Yes      | XRD, XRF                     | No      | Orna 1981        |
|               | Gold                                                                            | 1475, 1575             | Van      | Yes      | PLM, XRD                     | No      | Cabelli 1982     |
|               | Gold leaf (on glue and on Lead White)                                           | 16-17 <sup>th</sup> c. | Edessa   | No       | FORS (UV-VIS),<br>Raman, XRF | No      | Keheyanyan 2016b |
|               | Gold shell                                                                      | 16-17 <sup>th</sup> c. | Edessa   | No       | FORS (UV-VIS),<br>Raman, XRF | No      | Keheyanyan 2016b |
|               | <i>Gold leaf (on brown layer of Cerussite, Hydrocerussite and Carbon black)</i> | 1665                   | Artsakh  | Yes      | Raman                        | Yes     | Baraldi 2016     |
| <b>SILVER</b> |                                                                                 |                        |          |          |                              |         |                  |
|               | Silver                                                                          | 12-13 <sup>th</sup> c. | Cilicia  | Yes      | PLM, XRD                     | No      | Cabelli 1984     |
|               | Silver                                                                          | 1455, 1475             | Van      | Yes      | PLM, XRD                     | No      | Cabelli 1982     |
| <b>ORANGE</b> |                                                                                 |                        |          |          |                              |         |                  |
|               | Minium                                                                          | 13-14 <sup>th</sup> c. | Gladzor  | Yes      | PLM, XRD                     | No      | Orna 1981        |
|               | Minium                                                                          | 14 <sup>th</sup> c.    | Van      | Yes      | Raman, FTIR,<br>SEM/EDS      | No      | Baraldi 2016     |
|               | <i>Red Lead</i>                                                                 | 15 <sup>th</sup> c.    | Van      | Yes      | Raman                        | Yes     | Keheyanyan 2018  |
|               | Red Lead                                                                        | 1609                   | --       | No       | Raman                        | No      | Maybury 2018     |
|               | Minium                                                                          | 16-17 <sup>th</sup> c. | Edessa   | No       | Raman                        | Yes     | Keheyanyan 2016b |
|               | Minium                                                                          | 17 <sup>th</sup> c.    | Cesarea  | Yes      | Raman                        | Yes     | Baraldi 2016     |
|               | Red Lead                                                                        | 1707                   | --       | No       | Raman                        | No      | Maybury 2018     |

|                                                   |                        |          |     |                                     |     |                 |
|---------------------------------------------------|------------------------|----------|-----|-------------------------------------|-----|-----------------|
| Red Lead                                          | 18 <sup>th</sup> c.    | --       | No  | Raman                               | No  | Maybury 2018    |
| Realgar                                           | 1455                   | Van      | Yes | PLM, XRD                            | No  | Cabelli 1982    |
| RED                                               |                        |          |     |                                     |     |                 |
| Vermilion                                         | 1045-64                | Kars     | Yes | --                                  | --  | Cabelli 1984    |
| Vermilion                                         | 1253-1348              | Cilicia  | Yes | PLM, XRD                            | No  | Cabelli 1982-84 |
| Vermilion                                         | 13-14 <sup>th</sup> c. | Gladzor  | Yes | PLM, XRD                            | No  | Orna 1981       |
| Vermilion                                         | 14 <sup>th</sup> c.    | Van      | Yes | SEM/EDS                             | No  | Keheyani 2016a  |
| Cinnabar                                          | 15 <sup>th</sup> c.    | Van      | Yes | Raman                               | Yes | Keheyani 2018   |
| Vermilion                                         | 1455-1575              | Van      | Yes | PLM, XRD                            | No  | Cabelli 1982-84 |
| Vermilion                                         | 16 <sup>th</sup> c.    | --       | No  | Raman                               | No  | Maybury 2018    |
| Cinnabar                                          | 16-17 <sup>th</sup> c. | Edessa   | No  | FORS (UV-VIS),<br>Raman, XRF        | No  | Keheyani 2016b  |
| Vermilion                                         | 1609                   | --       | No  | Raman                               | No  | Maybury 2018    |
| Vermilion                                         | 17 <sup>th</sup> c.    | Cesarea  | Yes | Raman                               | No  | Baraldi 2016    |
| Vermilion                                         | 1707                   | --       | No  | Raman                               | No  | Maybury 2018    |
| Vermilion                                         | 18 <sup>th</sup> c.    | --       | No  | Raman                               | No  | Maybury 2018    |
| Red ochre                                         | 974                    | --       | Yes | Raman                               | Yes | Eliazyan 2021   |
| Red lake (madder)                                 | 13-14 <sup>th</sup> c. | Gladzor  | Yes | PLM, UV-VIS                         | No  | Orna 1981       |
| Fluorescent dye<br>(Armenian cochineal<br>likely) | 1665                   | Artsakh  | Yes | Raman, SERS                         | No  | Baraldi 2016    |
| Fluorescent dye<br>(Armenian cochineal<br>likely) | 17 <sup>th</sup> c.    | Cesarea  | Yes | Raman, SERS                         | No  | Baraldi 2016    |
| CARMINE                                           |                        |          |     |                                     |     |                 |
| Organic Red Lake                                  | 1045-64                | Kars     | Yes | --                                  | --  | Cabelli 1984    |
| Red Lake (probably<br>Madder)                     | 1253-1348              | Cilicia  | Yes | FTIR                                | No  | Cabelli 1982-84 |
| Red Lake (probably<br>Madder)                     | 1455-1575              | Van      | Yes | FTIR                                | No  | Cabelli 1982-84 |
| Red Lake                                          | 13-14 <sup>th</sup> c. | Gladzor  | Yes | PLM, UV-VIS                         | No  | Orna 1981       |
| Red Lake (probably<br>Madder)                     | 1487                   | Noravank | Yes | FTIR                                | Yes | Brostoff 2010   |
| PINK                                              |                        |          |     |                                     |     |                 |
| Lac Dye probably                                  | 15 <sup>th</sup> c.    | Van      | Yes | FORS (UV-VIS),<br>SERS, Fluorimetry | Yes | Keheyani 2018   |
| Armenian cochineal                                | 16-17 <sup>th</sup> c. | Edessa   | No  | FORS (UV-VIS)                       | Yes | Keheyani 2016b  |
| PURPLE                                            |                        |          |     |                                     |     |                 |
| Organic purple                                    | 1455                   | Van      | Yes | PLM, XRD                            | No  | Cabelli 1982    |
| BLUE                                              |                        |          |     |                                     |     |                 |
| Ultramarine                                       | 1045-64                | Kars     | Yes | --                                  | --  | Cabelli 1984    |
| Ultramarine                                       | 1253-1348              | Cilicia  | Yes | PLM, XRD                            | No  | Cabelli 1982-84 |
| Ultramarine                                       | 13-14 <sup>th</sup> c. | Gladzor  | Yes | PLM, XRD                            | No  | Orna 1981       |
| Ultramarine                                       | 14 <sup>th</sup> c.    | Van      | Yes | Raman, FTIR,<br>SEM/EDS             | No  | Keheyani 2016a  |
| Ultramarine                                       | 1455-1575              | Van      | Yes | PLM, XRD                            | No  | Cabelli 1982-84 |
| Ultramarine                                       | 1487                   | Noravank | Yes | XRF, ESEM/EDS,<br>FTIR, $\mu$ XRD   | Yes | Brostoff 2010   |
| Ultramarine                                       | 15 <sup>th</sup> c.    | Van      | Yes | Raman                               | Yes | Keheyani 2018   |
| Lapis Lazuli                                      | 16 <sup>th</sup> c.    | --       | No  | Raman                               | No  | Maybury 2018    |
| Ultramarine                                       | 16-17 <sup>th</sup> c. | Edessa   | No  | FORS (UV-VIS),<br>Raman, XRF        | No  | Keheyani 2016b  |
| Lazurite                                          | 17 <sup>th</sup> c.    | Cesarea  | Yes | Raman                               | No  | Baraldi 2016    |
| Lapis Lazuli                                      | 1707                   | --       | No  | Raman                               | No  | Maybury 2018    |
| Lapis Lazuli                                      | 18 <sup>th</sup> c.    | --       | No  | Raman                               | No  | Maybury 2018    |
| Azurite                                           | 13-14 <sup>th</sup> c. | Gladzor  | Yes | PLM, XRD                            | No  | Orna 1981       |
| Azurite                                           | 1665                   | Artsakh  | Yes | Raman                               | Yes | Baraldi 2016    |

|                             |                        |         |     |                              |     |                |
|-----------------------------|------------------------|---------|-----|------------------------------|-----|----------------|
| <b>Smalt</b>                | 1455                   | Van     | Yes | PLM, XRD                     | No  | Cabelli 1982   |
| <b>Smalt</b>                | 16-17 <sup>th</sup> c. | Edessa  | No  | FORS (UV-VIS), XRF           | Yes | Keheyani 2016b |
| <b>Indigo</b>               | 974                    | --      | Yes | FTIR                         | Yes | Eliazyan 2021  |
| <b>Indigo</b>               | 1304                   | --      | No  | Raman                        | No  | Maybury 2018   |
| <b>Indigo</b>               | 14 <sup>th</sup> c.    | Van     | Yes | FTIR                         | Yes | Keheyani 2016a |
| <b>Indigo</b>               | 15 <sup>th</sup> c.    | Van     | Yes | Raman                        | Yes | Keheyani 2018  |
| <b>Indigo</b>               | 16 <sup>th</sup> c.    | --      | No  | Raman                        | No  | Maybury 2018   |
| <b>Indigo</b>               | 1609                   | --      | No  | Raman                        | No  | Maybury 2018   |
| <b>Indigo</b>               | 16-17 <sup>th</sup> c. | Edessa  | No  | FORS (UV-VIS),<br>Raman, XRF | No  | Keheyani 2016b |
| <b>GREEN</b>                |                        |         |     |                              |     |                |
| <b>Verdigris</b>            | 16-17 <sup>th</sup> c. | Edessa  | No  | FORS (UV-VIS),<br>Raman, XRF | No  | Keheyani 2016b |
| <b>Malachite</b>            | 16-17 <sup>th</sup> c. | Edessa  | No  | FORS (UV-VIS),<br>Raman, XRF | No  | Keheyani 2016b |
| <b>Antlerite</b>            | 14 <sup>th</sup> c.    | Van     | Yes | Raman                        | Yes | Keheyani 2016a |
| <b>Antlerite</b>            | 17 <sup>th</sup> c.    | Cesarea | Yes | Raman                        | Yes | Baraldi 2016   |
| <b>Gamboge (olive)</b>      | 13-14 <sup>th</sup> c. | Gladzor | Yes | PLM (tentatively)            | No  | Orna 1981      |
| <b>BLACK</b>                |                        |         |     |                              |     |                |
| <b>Charcoal black</b>       | 13-14 <sup>th</sup> c. | Gladzor | Yes | PLM, XRD                     | No  | Orna 1981      |
| <b>Carbon</b>               | 14 <sup>th</sup> c.    | Van     | Yes | Raman, FTIR,<br>SEM/EDS      | No  | Keheyani 2016a |
| <b>Iron-gall ink carbon</b> | 15 <sup>th</sup> c.    | Van     | Yes | Raman, FORS,<br>SEM/EDX      | No  | Keheyani 2018  |
| <b>Carbon Black</b>         | 16-17 <sup>th</sup> c. | Edessa  | No  | FORS (UV-VIS),<br>Raman, XRF | No  | Keheyani 2016b |
| <b>Carbon Black</b>         | 17 <sup>th</sup> c.    | Cesarea | Yes | Raman                        | No  | Baraldi 2016   |

\* PLM = Polarized light microscopy; XRD = X-ray Diffraction; XRF = X-ray Fluorescence; FORS = UV-Visible diffuse reflectance spectrophotometry with Optic Fibres; FTIR = Fourier Transform infrared spectroscopy; UV-VIS = UV-visible spectrophotometer; Raman = Raman microscopy; SERS = Surface-enhanced Raman spectroscopy; SEM/EDS = Scanning electron microscopy/energy dispersive x-ray spectrometry; ESEM/EDS = Environmental scanning electron microscopy/energy dispersive spectroscopy.
