# Supplementary material
Source: MDPI journal article supplement (https://www.mdpi.com/2571-9408/6/3/170)
Supplement: s1 [file s1 › supplementary/Table S2.pdf]

## Supplementary Material

**Table S2.** The list of **pigment mixtures** identified in Armenian manuscripts. Names for the pigments are maintained with their initial designation by the authors. Acronyms for the techniques are provided at the end of the table.

| Colour                 | Dye/Pigment                                | Ms. Date                     | School        | Sampling  | Technique                      | Spectra    | Ref.                 |
|------------------------|--------------------------------------------|------------------------------|---------------|-----------|--------------------------------|------------|----------------------|
| <b>YELLOW</b>          |                                            |                              |               |           |                                |            |                      |
|                        | Orpiment+Organic yellow                    | 1045-64                      | Kars          | Yes       | --                             | --         | Cabelli 1984         |
|                        | Orpiment+Organic yellow                    | 1253-1348                    | Cilicia       | Yes       | PLM, XRD                       | No         | Cabelli 1984         |
|                        | Orpiment+Organic yellow                    | 1475                         | Van           | Yes       | PLM, XRD                       | No         | Cabelli 1984         |
|                        | Raelgar+Orpiment+ Gamboge+Massicot         | 13-14 <sup>th</sup> c.       | Gladzor       | Yes       | PLM, XRD                       | No         | Orna 1981            |
|                        | Orpiment+Massicot                          | 13-14 <sup>th</sup> c.       | Gladzor       | Yes       | PLM, XRD                       | No         | Orna 1981            |
| <b>BROWNISH YELLOW</b> |                                            |                              |               |           |                                |            |                      |
|                        | Realgar+Orpiment+ Vermilion+Charcoal black | 13-14 <sup>th</sup> c.       | Gladzor       | Yes       | PLM, XRD                       | No         | Orna 1981            |
|                        | Vermilion+Gamboge+ Gypsum                  | 13-14 <sup>th</sup> c.       | Gladzor       | Yes       | PLM, XRD                       | No         | Orna 1981            |
|                        | Vermilion+Gamboge                          | 13-14 <sup>th</sup> c.       | Gladzor       | Yes       | PLM, XRD                       | No         | Orna 1981            |
| <b>ORANGE</b>          |                                            |                              |               |           |                                |            |                      |
|                        | Vermilion+White                            | 1045-64                      | Kars          | Yes       | --                             | --         | Cabelli 1984         |
|                        | Lead+Organic yellow                        | 1253-1348                    | Cilicia       | Yes       | PLM, XRD                       | No         | Cabelli 1984         |
|                        | Vermilion+White                            | 1455-1575                    | Van           | Yes       | PLM, XRD                       | No         | Cabelli 1984         |
|                        | Lead+Organic yellow                        | 1253-62                      | Cilicia       | Yes       | PLM, XRD                       | No         | Cabelli 1982         |
|                        | Vermilion+Orpiment+ Organic yellow         | 1253-62                      | Cilicia       | Yes       | PLM, XRD                       | No         | Cabelli 1982         |
|                        | Orpiment+Minium                            | 13-14 <sup>th</sup> c.       | Gladzor       | Yes       | PLM, XRD                       | No         | Orna 1981            |
|                        | Red Lead+Vermilion                         | 1487                         | Noravank      | Yes       | XRF, ESEM/EDS                  | No         | Brostoff 2010        |
|                        | Red Lead+Vermilion                         | 16 <sup>th</sup> c.          | --            | No        | Raman                          | No         | Maybury 2018         |
|                        | <i>Cinnabar+Minium</i>                     | <i>16-17<sup>th</sup> c.</i> | <i>Edessa</i> | <i>No</i> | <i>Raman</i>                   | <i>Yes</i> | <i>Keheyan 2016b</i> |
|                        | Red Lead+Vermilion                         | 1707                         | --            | No        | Raman                          | No         | Maybury 2018         |
| <b>CARMINE</b>         |                                            |                              |               |           |                                |            |                      |
|                        | Red Lake+White Lead                        | 13-14 <sup>th</sup> c.       | Gladzor       | Yes       | PLM, XRD                       | No         | Orna 1981            |
| <b>PINK</b>            |                                            |                              |               |           |                                |            |                      |
|                        | Vermilion+White Lead                       | 1253, 13 <sup>th</sup> c.    | Cilicia       | Yes       | PLM, XRD                       | No         | Cabelli 1984         |
|                        | Tin white+Red Lake likely                  | 1487                         | Noravank      | Yes       | XRF, ESEM/EDS, FTIR, $\mu$ XRD | No         | Brostoff 2010        |
| <b>PURPLE</b>          |                                            |                              |               |           |                                |            |                      |
|                        | Vermilion+Organic red and blue             | 1045-64                      | Kars          | Yes       | --                             | --         | Cabelli 1984         |
|                        | Vermilion+Organic red and blue             | 1253-1348                    | Cilicia       | Yes       | PLM, XRD                       | No         | Cabelli 1984         |
|                        | Vermilion+Organic red and blue             | 1455-1575                    | Van           | Yes       | PLM, XRD                       | No         | Cabelli 1984         |
|                        | Vermilion+Ultramarine +Organic red         | 1045-64                      | Kars          | Yes       | --                             | --         | Cabelli 1984         |
|                        | Vermilion+Ultramarine +Organic red         | 1253-1348                    | Cilicia       | Yes       | PLM, XRD                       | No         | Cabelli 1984         |
|                        | Red lake+Ultramarine                       | 13-14 <sup>th</sup> c.       | Gladzor       | Yes       | PLM, XRD                       | No         | Orna 1981            |
| <b>BLUE</b>            |                                            |                              |               |           |                                |            |                      |
|                        | Indigo+Cinnabar (dark blue/violet)         | 14 <sup>th</sup> c.          | Van           | Yes       | Raman, FTIR, SEM/EDS           | No         | Keheyan 2016a        |

|                                                                                  |                        |          |     |                                |     |               |
|----------------------------------------------------------------------------------|------------------------|----------|-----|--------------------------------|-----|---------------|
| Indigo+Cinnabar (dark blue/violet)                                               | 15 <sup>th</sup> c.    | Van      | Yes | Raman, FORS (UV-VIS), SEM/EDX  | No  | Keheyan 2018  |
| Ultramarine+Smalt+Tin White+possibly Quartz, Indigo and Lead White (medium blue) | 1487                   | Noravank | Yes | XRF, ESEM/EDS, FTIR, $\mu$ XRD | Yes | Brostoff 2010 |
| GREEN                                                                            |                        |          |     |                                |     |               |
| Orpiment+Organic blue                                                            | 1045-64                | Kars     | Yes | --                             | --  | Cabelli 1984  |
| Vermilion+White Lead+Organic blue and yellow (olive)                             | 1262                   | Cilicia  | Yes | PLM, XRD                       | No  | Cabelli 1984  |
| Orpiment+Organic blue                                                            | 1253-1348              | Cilicia  | Yes | PLM, XRD                       | No  | Cabelli 1984  |
| Orpiment+Organic blue                                                            | 1455-1575              | Van      | Yes | PLM, XRD                       | No  | Cabelli 1982  |
| Organic yellow+Ultramarine                                                       | 1253-1348              | Cilicia  | Yes | PLM, XRD                       | No  | Cabelli 1984  |
| Orpiment+Ultramarine                                                             | 13-14 <sup>th</sup> c. | Gladzor  | Yes | PLM, XRD                       | No  | Orna 1981     |
| Orpiment+Gamboge+Ultramarine                                                     | 13-14 <sup>th</sup> c. | Gladzor  | Yes | PLM, XRD                       | No  | Orna 1981     |
| Orpiment+Ultramarine +Vermilion+Anhydrite                                        | 13-14 <sup>th</sup> c. | Gladzor  | Yes | PLM, XRD                       | No  | Orna 1981     |
| Orpiment+Azurite                                                                 | 13-14 <sup>th</sup> c. | Gladzor  | Yes | PLM, XRD                       | No  | Orna 1981     |
| Orpiment+Indigo (Vergaut)                                                        | 14 <sup>th</sup> c.    | Van      | Yes | Raman                          | Yes | Keheyan 2016a |
| Orpiment+Indigo (Vergaut)                                                        | 15 <sup>th</sup> c.    | Van      | Yes | Raman, FORS (UV-VIS), SEM/EDX  | No  | Keheyan 2018  |
| Indigo+Orpiment                                                                  | 1609                   | --       | No  | Raman                          | No  | Maybury 2018  |
| Indigo+Orpiment                                                                  | 16-17 <sup>th</sup> c. | Edessa   | No  | FORS, Raman, XRF               | No  | Keheyan 2016b |
| Indigo+Litharge (light green)                                                    | 1665                   | Artsakh  | Yes | Raman                          | Yes | Baraldi 2016  |
| BROWN                                                                            |                        |          |     |                                |     |               |
| Vermilion+Orpiment+Gypsum+Charcoal black                                         | 13-14 <sup>th</sup> c. | Gladzor  | Yes | PLM, XRD                       | No  | Orna 1981     |
| Vermilion+Orpiment+Whiting+Charcoal black+Iron oxide hydrate                     | 13-14 <sup>th</sup> c. | Gladzor  | Yes | PLM, XRD                       | No  | Orna 1981     |
| White Lead+Orpiment+Vermilion and black pigment                                  | 1348                   | Cilicia  | Yes | PLM, XRD                       | No  | Cabelli 1984  |
| Massicot+Carbon                                                                  | 1665                   | Artsakh  | Yes | Raman                          | Yes | Baraldi 2016  |
| FLESH                                                                            |                        |          |     |                                |     |               |
| Vermilion+White Lead+Organic yellow                                              | 1253, 1262             | Cilicia  | Yes | PLM, XRD                       | No  | Cabelli 1984  |
| Orpiment+ Realgar                                                                | 13-14 <sup>th</sup> c. | Gladzor  | Yes | PLM, XRD                       | No  | Orna 1981     |
| Orpiment+ Realgar+ Gamboge+Gypsum                                                | 13-14 <sup>th</sup> c. | Gladzor  | Yes | PLM, XRD                       | No  | Orna 1981     |
| Vermilion+Anhydrite+ Gamboge                                                     | 13-14 <sup>th</sup> c. | Gladzor  | Yes | PLM, XRD                       | No  | Orna 1981     |
| Vermilion based (flesh+drawing lines)                                            | 1487                   | Noravank | Yes | XRF                            | No  | Brostoff 2010 |
| INKS                                                                             |                        |          |     |                                |     |               |
| Black ink: Iron-gall                                                             | 974                    | --       | Yes | FTIR                           | Yes | Eliazyan 2021 |
| Black ink: Iron-gall (from painted area)                                         | 14 <sup>th</sup> c.    | Van      | Yes | Raman, FTIR, SEM/EDS           | No  | Keheyan 2016a |
| Black ink: Iron-gall                                                             | 14-15 <sup>th</sup> c. | various  | No  | NIR                            | No  | Rabin 2014    |
| Black ink: Iron-gall                                                             | 16 <sup>th</sup> c.    | --       | Yes | Py/GC/MS                       | Yes | Keheyan 2009  |
| Black ink: Iron-gall                                                             | 15 <sup>th</sup> c.    | Van      | Yes | Raman, FORS, SEM/EDX           | Yes | Keheyan 2018  |
| Red ink: Cinnabar                                                                | 14 <sup>th</sup> c.    | Van      | Yes | Raman, SEM/EDS                 | No  | Keheyan 2016a |
| Red ink: Vermilion                                                               | 1487                   | Noravank | Yes | XRF                            | No  | Brostoff 2010 |
| Red ink: Cinnabar                                                                | 16 <sup>th</sup> c.    | --       | Yes | Py/GC/MS                       | Yes | Keheyan 2009  |

\* PLM = Polarized light microscopy; XRD = X-ray Diffraction; XRF = X-ray Fluorescence; FORS = UV-Visible diffuse reflectance spectrophotometry with Optic Fibres; FTIR = Fourier Transform infrared spectroscopy; UV-VIS = UV-visible spectrophotometer; Raman = Raman microscopy; SERS = Surface-enhanced Raman spectroscopy; SEM/EDS = Scanning electron microscopy/energy dispersive x-ray spectrometry; ESEM/EDS = Environmental scanning electron microscopy/energy dispersive spectroscopy; SEM/EDX = Scanning electron microscopy/energy dispersive X-ray spectroscopy; NIR = Near Infrared Reflectography; Py/GC/MS = Pyrolysis/gas chromatography/mass spectrometry.
